# Supplementary material for: Predicting Dyspnea Inducers by Molecular Topology
Source: Hindawi journal article supplement (doi:10.1155/2013/798508), 2012-08-30
Supplement: f1 [file 798508.f1.docx]

**Appendix I. SUPPLEMENTARY MATERIAL**

Annex **I.** Molecular descriptors for each compound used in the *training set* and conforming the discriminant function (Eq. 1).

| **Compound** | **ATS2e** | **MATS2v** | **MATS8e** | **MATS1p** | **DF** | **Prob.(A)** | **CLASS** |
| --- | --- | --- | --- | --- | --- | --- | --- |
| **Active group** | | | | | | | |
| Adenosine | 3.629 | -0.108 | -0.37 | -0.375 | 2.259 | 0.905 | A |
| Amphotericin | 4.684 | -0.084 | 0.06 | -0.072 | 3.866 | 0.979 | A |
| Anagrelidehydrochloride | 3.458 | 0.344 | 3.329 | -0.12 | 5.07 | 0.994 | A |
| Anastrozole | 3.601 | 0.248 | 0.233 | 0.035 | -2.044 | 0.115 | I |
| Argatroban | 4.124 | 0.295 | 0.209 | -0.389 | 2.23 | 0.903 | A |
| Atovaquone | 3.818 | -0.031 | -0.16 | 0.009 | -0.122 | 0.47 | I |
| Busulfan | 3.271 | 0.207 | -0.21 | -0.801 | 2.502 | 0.924 | A |
| Capecitabine | 3.814 | 0.049 | 0.095 | -0.284 | 2.054 | 0.886 | A |
| Cidofovir | 3.493 | 0.052 | 0.307 | -0.536 | 3.462 | 0.97 | A |
| Cyclosporine | 4.922 | 0.09 | 0.213 | -0.224 | 4.788 | 0.992 | A |
| Daunorubicin | 4.326 | -0.092 | -0.058 | -0.064 | 2.559 | 0.928 | A |
| Dofetilide | 3.92 | 0.238 | -0.164 | -0.662 | 3.228 | 0.962 | A |
| Hycamtin | 4.122 | 0.034 | -0.291 | -0.148 | 1.16 | 0.762 | A |
| Imatinib | 4.116 | 0.155 | 0.119 | -0.232 | 1.837 | 0.863 | A |
| Irinotecanhydrochloride | 4.423 | 0.149 | -0.305 | -0.163 | 1.287 | 0.784 | A |
| Lenalidomide | 3.58 | 0.128 | -0.44 | -0.12 | -1.628 | 0.164 | I |
| Mitoxantrone | 3.949 | -0.14 | -0.067 | -0.103 | 2.082 | 0.889 | A |
| Mycophenolicacid | 3.676 | 0.141 | -0.399 | -0.098 | -1.514 | 0.18 | I |
| Nelarabine | 3.731 | -0.051 | -0.091 | -0.428 | 3.177 | 0.96 | A |
| Nicotine | 2.934 | -0.153 | 0 | -0.262 | 0.575 | 0.64 | A |
| Nilutamide | 3.865 | 0.315 | -0.375 | 0.007 | -2.939 | 0.05 | I |
| Pentostatin | 3.588 | -0.104 | -0.174 | -0.343 | 2.321 | 0.911 | A |
| Pergolide | 3.643 | -0.095 | 0.236 | -0.003 | 0.822 | 0.695 | A |
| Pindolol | 3.353 | -0.251 | 0.171 | -0.168 | 2.179 | 0.898 | A |
| Porfimersodium | 4.344 | 0.075 | 0.072 | -0.061 | 1.69 | 0.844 | A |
| Propafenonehydrochloride | 3.573 | -0.143 | 0.073 | -0.075 | 1.127 | 0.755 | A |
| Ribavirin | 3.492 | -0.27 | -0.131 | -0.289 | 2.928 | 0.949 | A |
| Risperidone | 4.008 | -0.063 | -0.15 | -0.037 | 1.021 | 0.735 | A |
| Sprycel | 4.046 | 0.045 | -0.133 | -0.107 | 0.917 | 0.715 | A |
| Tiagabine | 3.698 | 0.261 | 0.008 | 0.002 | -2.125 | 0.107 | I |
| Tobramycin | 4.108 | -0.244 | -0.003 | -0.181 | 4.012 | 0.982 | A |
| Vinorelbine | 4.736 | 0.094 | 0.035 | -0.154 | 3.295 | 0.964 | A |
| Zoledronicacid | 3.549 | 0.168 | 0 | -0.63 | 2.792 | 0.942 | A |
| **Inactive group** | | | | | | | |
| Acitretin | 3.557 | 0.214 | -0.238 | -0.048 | -2.385 | 0.084 | I |
| Allopurinol | 2.919 | 0.069 | 0 | -0.256 | -1.102 | 0.249 | I |
| Alprazolam | 3.688 | 0.086 | -0.347 | 0.069 | -2.209 | 0.099 | I |
| Altretamine | 3.223 | 1.024 | 0 | -1 | -1.527 | 0.178 | I |
| Amlodipine | 3.81 | 0.129 | -0.101 | -0.146 | -0.004 | 0.499 | I |
| Bexarotene | 3.838 | 0.305 | -0.105 | 0.006 | -2.322 | 0.089 | I |
| Buspirone | 3.879 | 0.231 | -0.084 | -0.261 | 0.36 | 0.589 | A |
| Carbamazepine | 3.436 | 0.516 | 0 | -0.081 | -4.109 | 0.016 | I |
| Carmustine | 2.781 | 0.381 | 0.959 | 0.133 | -4.441 | 0.012 | I |
| Celecoxib | 3.97 | 0.359 | -0.455 | -0.262 | -1.132 | 0.244 | I |
| Chantix | 3.41 | -0.121 | 0 | -0.158 | 0.949 | 0.721 | A |
| Clonazepam | 3.666 | 0.15 | 0.714 | 0.223 | -1.456 | 0.189 | I |
| Clozapine | 3.709 | -0.059 | -0.542 | -0.184 | 0.327 | 0.581 | A |
| Cysteamine | 1.174 | -0.132 | 0 | -0.011 | -6.532 | 0.001 | I |
| Deferasirox | 3.909 | 0.054 | 0.056 | 0.004 | 0.062 | 0.516 | A |
| Desloratadine | 3.62 | -0.057 | -1.124 | -0.043 | -2.321 | 0.089 | I |
| Desvenlafaxine | 3.427 | -0.081 | -0.87 | -0.079 | -1.86 | 0.135 | I |
| Diclofenac | 3.438 | 0.214 | 0.912 | -0.02 | -0.314 | 0.422 | I |
| Didanosine | 3.488 | 0.034 | -1.146 | -0.386 | -0.853 | 0.299 | I |
| Entacapone | 3.571 | 0.011 | 0.701 | 0.119 | 0.009 | 0.502 | A |
| Estazolam | 3.629 | 0.144 | -0.549 | 0.062 | -3.203 | 0.039 | I |
| Femara | 3.55 | 0.205 | 0.051 | 0.046 | -2.381 | 0.085 | I |
| Fenofibrate | 3.759 | -0.027 | -0.308 | -0.069 | -0.079 | 0.48 | I |
| Flurbiprofen | 3.378 | 0.163 | -0.264 | 0.01 | -3.028 | 0.046 | I |
| Fluvoxamine | 3.565 | 0.313 | 0.152 | -0.034 | -2.285 | 0.092 | I |
| Gabapentin | 2.922 | 0.311 | 0 | 0 | -4.73 | 0.009 | I |
| Gadoversetamide | 4.66 | 0.375 | -0.71 | -0.322 | 0.613 | 0.649 | A |
| Guanfacine | 3.183 | 0.551 | -0.461 | -0.04 | -6.447 | 0.002 | I |
| Indomethacin | 3.79 | 0.143 | -0.521 | -0.081 | -1.603 | 0.168 | I |
| Iopromide | 3.933 | 0.068 | -0.119 | 0.003 | -0.36 | 0.411 | I |
| Isocarboxazid | 3.295 | -0.148 | -0.272 | 0.187 | -2.376 | 0.085 | I |
| Isradipine | 3.887 | 0.068 | -0.278 | 0.038 | -1.116 | 0.247 | I |
| Ketoprofen | 3.404 | 0.202 | -0.287 | 0.009 | -3.277 | 0.036 | I |
| Lamivudine | 3.315 | 0.114 | -0.881 | -0.081 | -3.59 | 0.027 | I |
| Lamotrigine | 3.347 | 0.382 | 0.385 | 0.068 | -3.637 | 0.026 | I |
| Latanoprost | 3.829 | 0.024 | -0.095 | -0.031 | -0.038 | 0.491 | I |
| Leflunomide | 3.621 | 0.239 | 0.279 | -0.012 | -1.467 | 0.187 | I |
| Loratadine | 3.839 | 0.465 | -0.19 | -0.095 | -2.907 | 0.052 | I |
| Lorazepam | 3.631 | 0.181 | -0.635 | -0.041 | -2.892 | 0.053 | I |
| Mesalamine | 2.912 | 0.08 | 0 | 0 | -3.105 | 0.043 | I |
| Misoprostol | 3.682 | 0.031 | 0.01 | -0.045 | -0.17 | 0.458 | I |
| Nabilone | 3.87 | -0.105 | -0.036 | -0.03 | 1.131 | 0.756 | A |
| Nabumetone | 3.27 | -0.056 | -0.352 | -0.056 | -1.483 | 0.185 | I |
| Naproxen | 3.335 | 0.198 | -0.757 | -0.056 | -4.037 | 0.017 | I |
| Nicardipine | 4.058 | 0.195 | 0.641 | 0.039 | 0.558 | 0.636 | A |
| Nitricoxide | 0 | 0 | 0 | -1 | -3.517 | 0.029 | I |
| Nitroglicerin | 3.283 | 0.242 | 0.568 | 0.184 | -3.265 | 0.037 | I |
| Olanzapine | 3.678 | -0.076 | -0.275 | -0.053 | -0.006 | 0.499 | I |
| Oxcarbazepine | 3.518 | 0.279 | 0 | -0.07 | -2.257 | 0.095 | I |
| Oxybutynin | 3.669 | 0.078 | 0.117 | -0.103 | 0.131 | 0.533 | A |
| Phentermine | 2.802 | -0.12 | 0 | 0 | -1.992 | 0.12 | I |
| Propofol | 2.978 | -0.037 | 0 | 0 | -2.077 | 0.111 | I |
| Riluzole | 3.5 | 0.69 | 0.2 | -0.008 | -5.256 | 0.005 | I |
| Ritonavir | 4.38 | 0.284 | -0.182 | -0.04 | -0.438 | 0.392 | I |
| Selegiline | 2.917 | -0.113 | 0.077 | -0.154 | -0.388 | 0.404 | I |
| Tacrine hydrochloride | 3.257 | -0.135 | 0 | -0.05 | -0.196 | 0.451 | I |
| Telbivudine | 3.474 | 0.055 | -0.332 | -0.268 | -0.065 | 0.484 | I |
| Temazepam | 3.617 | 0.181 | -0.421 | -0.084 | -2.125 | 0.107 | I |
| Temozolomide | 3.318 | 0.202 | 0 | -0.419 | 0.312 | 0.577 | A |
| Terbinafine | 3.476 | -0.02 | 0.048 | -0.089 | 0.013 | 0.503 | A |
| Thalidomide | 3.595 | 0.171 | -0.373 | -0.112 | -1.799 | 0.142 | I |
| Theophyllineanhydrous | 3.25 | 0.355 | 0 | -0.592 | 0.306 | 0.576 | A |
| Valsartan | 3.944 | 0.283 | -0.2 | 0.155 | -3.183 | 0.04 | I |
| Venlafaxine | 3.459 | -0.08 | -0.626 | -0.136 | -0.794 | 0.311 | I |
| Ziagen | 3.611 | 0.186 | -0.296 | -0.28 | -0.435 | 0.393 | I |
| Zidovudine | 3.539 | 0.116 | -0.424 | -0.176 | -1.208 | 0.23 | I |
| Zolmitriptan | 3.587 | 0.399 | -0.164 | -0.226 | -2.13 | 0.106 | I |
| Zolpidem | 3.676 | 0.165 | 0.033 | -0.193 | 0.006 | 0.502 | A |

Annex **II.** Molecular descriptors for each compound used in the *test set* and conforming the discriminant function (Eq. 1).

| **Compound** | **ATS2e** | **MATS2v** | **MATS8e** | **MATS1p** | **DF** | **Prob.(A)** | **CLASS** |
| --- | --- | --- | --- | --- | --- | --- | --- |
| **Active group** | | | | | | | |
| Acamprosate | 2.919 | 0.199 | 0 | -0.634 | 0.778 | 0.685 | A |
| Acyclovir | 3.353 | 0.158 | -1.058 | -0.551 | -0.704 | 0.331 | I |
| Alimta | 3.99 | 0.274 | -0.295 | -0.112 | -1.216 | 0.229 | I |
| Ambrisentan | 3.874 | 0.196 | 0.15 | -0.137 | 0.207 | 0.552 | A |
| Amiodarone | 3.901 | -0.007 | 0.21 | 0.013 | 0.76 | 0.682 | A |
| Atenolol | 3.337 | -0.123 | -0.058 | -0.132 | 0.427 | 0.605 | A |
| Atp | 4.276 | 0.51 | -0.472 | -0.8 | 2.634 | 0.933 | A |
| Bortezomib | 3.774 | 0.117 | 0.063 | -0.385 | 2.13 | 0.894 | A |
| Clarithromycin | 4.579 | -0.118 | 0.066 | -0.202 | 4.786 | 0.992 | A |
| Clofarabine | 3.71 | -0.155 | -0.208 | -0.273 | 2.441 | 0.92 | A |
| Clopidrogel | 3.578 | 0.227 | 0.038 | -0.012 | -2.056 | 0.114 | I |
| Cyanocobalamin | 5.309 | 0.294 | 0.087 | -0.373 | 5.267 | 0.995 | A |
| Cytarabine | 3.483 | -0.062 | -0.365 | -0.298 | 0.946 | 0.72 | A |
| Dexrazoxane | 3.533 | -0.034 | -0.995 | -0.364 | -0.056 | 0.486 | I |
| Dipyridamole | 4.088 | 0.053 | 0.307 | -0.344 | 3.748 | 0.977 | A |
| Dirithromycin | 4.683 | -0.12 | 0.029 | -0.238 | 5.284 | 0.995 | A |
| Dobutamine | 3.51 | -0.127 | 0.011 | -0.029 | 0.347 | 0.586 | A |
| Eszopiclone | 3.929 | 0.223 | -0.028 | -0.329 | 1.195 | 0.768 | A |
| Flecainide | 4.008 | 0.222 | 0.464 | -0.146 | 1.192 | 0.767 | A |
| Fluoxetine | 3.642 | 0.385 | -0.266 | -0.071 | -3.256 | 0.037 | I |
| Ipratropiumbromide | 3.746 | 0.054 | 0.013 | -0.134 | 0.519 | 0.627 | A |
| Labetalol | 3.606 | 0.011 | -0.118 | -0.028 | -0.665 | 0.34 | I |
| Methamphetamine | 2.662 | -0.069 | 0 | -0.1 | -2.018 | 0.117 | I |
| Mirtazapine | 3.573 | 0.058 | 0.176 | -0.233 | 1.098 | 0.75 | A |
| Nimodipine | 3.922 | 0.104 | 0.372 | 0.007 | 0.44 | 0.608 | A |
| Oxycodone | 3.914 | -0.114 | -0.733 | -0.126 | 0.447 | 0.61 | A |
| Propranolol | 3.371 | -0.163 | -0.097 | -0.099 | 0.477 | 0.617 | A |
| Sildenafil | 4.123 | 0.073 | -0.06 | -0.452 | 3.672 | 0.975 | A |
| Ticagrelor | 4.166 | -0.183 | 0.086 | 0.001 | 2.593 | 0.93 | A |
| Trovafloxacin | 4.065 | -0.046 | -0.106 | -0.092 | 1.574 | 0.828 | A |
| **Inactive group** | | | | | | | |
| Acecainide | 3.368 | 0.067 | 0.572 | -0.215 | 1.21 | 0.77 | A |
| Aceclofenac | 3.634 | 0.204 | 0.232 | -0.057 | -0.952 | 0.279 | I |
| Acipimox | 2.946 | -0.181 | 0 | -0.06 | -0.692 | 0.334 | I |
| Acivicin | 2.984 | -0.231 | 0 | 0.031 | -0.901 | 0.289 | I |
| Acrivastine | 3.702 | 0.157 | -0.08 | -0.087 | -0.907 | 0.288 | I |
| Adefovir | 3.536 | 0.091 | 0.091 | -0.594 | 3.246 | 0.963 | A |
| Ademetionine | 3.916 | 0.021 | 0.156 | -0.058 | 1.008 | 0.733 | A |
| Adiphenine | 3.503 | 0.222 | 0.007 | -0.117 | -1.527 | 0.179 | I |
| Ajmaline | 3.97 | 0.028 | -0.178 | -0.096 | 0.635 | 0.654 | A |
| Albendazole | 3.393 | 0.655 | 0.108 | -0.059 | -5.145 | 0.006 | I |
| Alclofenac | 3.132 | 0.118 | -0.348 | -0.062 | -3.074 | 0.044 | I |
| Alfentanil | 3.926 | 0.138 | 0.041 | -0.077 | 0.078 | 0.52 | A |
| Amifostine | 2.893 | 0.223 | -0.989 | -0.349 | -3.844 | 0.021 | I |
| Aminophenazone | 3.389 | -0.092 | 0.263 | -0.12 | 0.998 | 0.731 | A |
| Aminorex | 3.008 | 0.469 | 0 | -0.184 | -4.244 | 0.014 | I |
| Asa | 3.067 | 0.147 | 0 | -0.111 | -2.311 | 0.09 | I |
| Ascorbic acid | 3.107 | -0.294 | 0 | -0.167 | 1.378 | 0.799 | A |
| Balsalazide | 3.753 | 0.089 | -0.416 | -0.014 | -1.582 | 0.171 | I |
| Bezafibrate | 3.732 | 0.093 | -0.094 | -0.063 | -0.573 | 0.361 | I |
| Biotin | 3.322 | 0.368 | -0.46 | 0 | -5.031 | 0.006 | I |
| Bucillamine | 3.048 | 0.216 | 0 | -0.014 | -3.581 | 0.027 | I |
| Carnidazole | 3.275 | -0.038 | 0.768 | -0.017 | 0.668 | 0.661 | A |
| Cefpodoxime | 3.889 | 0.001 | -0.173 | 0.004 | -0.139 | 0.466 | I |
| Cibenzoline | 3.465 | 0.259 | 0.111 | -0.082 | -1.924 | 0.127 | I |
| Cocaine | 3.667 | 0.166 | -0.12 | -0.166 | -0.577 | 0.36 | I |
| Disulfiram | 3.049 | -0.469 | 0.488 | 0.262 | 0.386 | 0.595 | A |
| Ergocalciferol | 3.843 | -0.01 | -0.048 | 0.002 | 0.107 | 0.527 | A |
| Flolan | 3.664 | -0.007 | -0.205 | -0.038 | -0.493 | 0.379 | I |
| Folic Acid | 4.029 | 0.127 | -0.303 | -0.194 | 0.54 | 0.632 | A |
| Gonadorelin | 4.955 | 0.067 | 0.156 | -0.175 | 4.554 | 0.99 | A |
| Lisinopril | 3.81 | 0.158 | -0.435 | -0.091 | -1.382 | 0.201 | I |
| Lisuride | 3.807 | 0.276 | -0.217 | -0.211 | -0.846 | 0.3 | I |
| Loxoprofen | 3.37 | 0.2 | -0.2 | 0.011 | -3.178 | 0.04 | I |
| Metaproterenol | 3.155 | -0.219 | -0.624 | -0.066 | -1.194 | 0.233 | I |
| Methyl phenidate | 3.254 | 0.239 | 0.194 | -0.112 | -1.979 | 0.121 | I |
| Mitotane | 3.374 | 1 | 0.446 | 0.015 | -7.45 | 0.001 | I |
| Pantothenic | 3.161 | 0.053 | -1.077 | -0.131 | -3.674 | 0.025 | I |
| Penicillamine | 2.706 | 0.259 | 0 | -0.009 | -4.915 | 0.007 | I |
| Procainamide | 3.178 | 0.02 | 0.086 | -0.199 | -0.23 | 0.443 | I |
| Pyridoxine | 2.933 | -0.103 | 0 | -0.09 | -1.065 | 0.256 | I |
| Repaglinide | 3.959 | 0.105 | 0.407 | -0.103 | 1.438 | 0.808 | A |
| Thiamine | 3.391 | -0.011 | -0.516 | -0.049 | -1.881 | 0.132 | I |
| Tretinoin | 3.479 | 0.357 | -0.193 | 0 | -3.889 | 0.02 | I |
| Troglitazone | 4.055 | -0.033 | 0.497 | -0.023 | 2.314 | 0.91 | A |
| Valproic acid | 2.519 | 0.375 | 0 | -0.028 | -6.145 | 0.002 | I |
